# Supplementary material for: Effective Non-Viral Delivery of siRNA to Acute Myeloid Leukemia Cells with Lipid-Substituted Polyethylenimines
Source: PubMed Central journal article supplement (PMC3432090; doi:10.1371/journal.pone.0044197), 2012-08-31

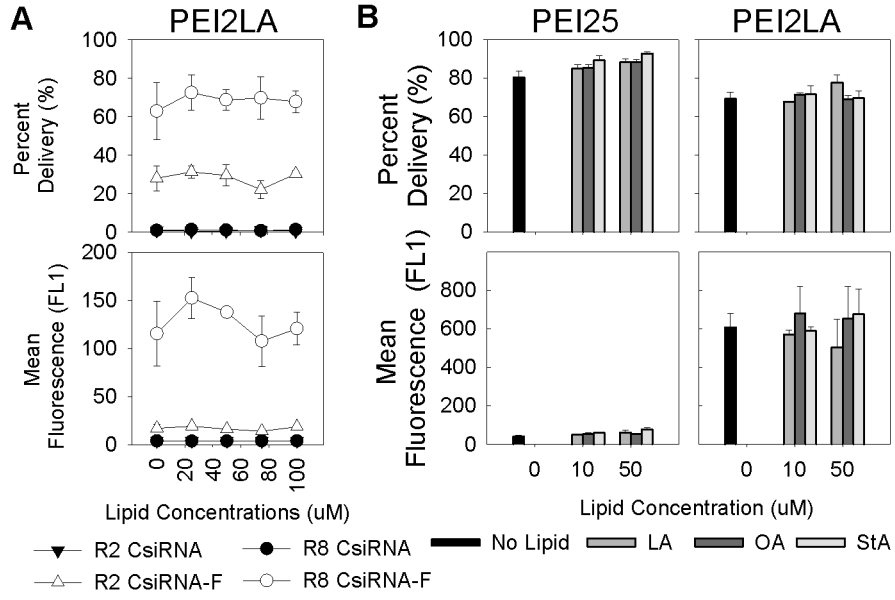

Supplement: pone.0044197.s002.pdf [file pone.0044197.s002.pdf]
